# Supplementary material for: Analysis on Hover Control Performance of T- and Cross-Shaped Tail Fin of X-Wing Single-Bar Biplane Flapping Wing
Source: Hindawi journal article supplement (doi:10.1155/2020/8880338), 2020-07-21
Supplement: f1 [file 8880338.f1.zip]

Archive with 2 entries (2 files):
- 8880338.f1/Cross Tail Fly FromTable.mp4
- 8880338.f1/T-shape Tail Flight Test.mp4
